# Supplementary material for: Knowledge of Previous Tasks: Task Similarity Influences Bias in Task Duration Predictions
Source: Front Psychol. 2018 May 24;9:760. doi: 10.3389/fpsyg.2018.00760 (PMC5976789; doi:10.3389/fpsyg.2018.00760)
Supplement: DATA SHEET S2 — Raw data from Experiment 2. [file Data_Sheet_2.xlsx]

## Sheet: Thomas & Konig (2018) paper - e
Gender	Age	Memory_Prompt	Task_Similarity	Memory_Familiarity	Task1_FamiliarityRating	Task1_Prediction	Task1_Actual	Corrections_Essay_1	Task2_FamiliarityRating	Task2_Prediction	Task2_Actual	signpredbiastask2	abspredbiastask2	signproperrsctask2	abserrorscoretask2	Corrections_Task_2	mempromptgroup	time1_mpgrps	recall_time1_mpgrps	task_1_actual_task_2_pred_difference_prompt	task_1_recall_task_2_pred_difference_prompt	signedpredbiastask1	abspredbiastask1	signed_error_score_task_1	abs_error_score_task_1	error_score_castle	error_score_first_essay	timet1essay	timet1castle	timet2essaytwice	timet2castlefirst	error_score_task_2_castle_first	error_score_task_2_essay_twice	pred_2_cpgrp	pred_2_epgrp	actual_time_1_essay_prompt_group	recalled_time_1_essay_prompt_group	actual_time_1_castle_prompt_group	recalled_time_1_castle_prompt_group	pred_2_essay_twice	pred_2_castle_first	signederrorscore2essay	signederrorscore1essay	signederrorscore2castle	signederroescore1castle
2	27	2	1	1	2	35	55	156	2	50	45	5	5	0.111111	0.111111	133	2	44	44	13	10	-20	20	-0.363636	0.363636	-0.604167	-0.363636	55	48	45	54	-0.444444	0.111111	30	30	44	44	35	35	50	30	0.111111	-0.363636	-0.444444	-0.604167
2	19	2	1	1	1	40	44	168	2	40	39	1	1	0.025641	0.025641	153	2	47	45	4	4	-4	4	-0.0909091	0.0909091	-0.829268	-0.0909091	44	41	39	35	0.285714	0.025641	45	45	47	45	32	32	40	45	0.025641	-0.0909091	0.285714	-0.829268
2	18	2	1	1	2	30	41	190	2	30	35	-5	5	-0.142857	0.142857	196	2	35	35	4	4	-11	11	-0.268293	0.268293	-0.516129	-0.268293	41	31	35	50	-0.3	-0.142857	35	35	35	35	31	31	30	35	-0.142857	-0.268293	-0.3	-0.516129
1	18	2	1	1	3	35	36	159	3	29	24	5	5	0.208333	0.208333	151	2	69	69	27	9	-1	1	-0.0277778	0.0277778	-0.166667	-0.0277778	36	42	24	22	0.818182	0.208333	40	40	69	69	15	15	29	40	0.208333	-0.0277778	0.818182	-0.166667
2	19	2	1	1	1	30	20	136	2	20	10	10	10	1	1	99	2	19	19	10	8	10	10	0.5	0.5	-0.75	0.5	20	32	10	45	-0.511111	1	22	22	19	19	28	28	20	22	1	0.5	-0.511111	-0.75
1	20	2	1	1	3	25	42	176	1	20	35	-15	15	-0.428571	0.428571	177	2	44	43	5	5	-17	17	-0.404762	0.404762	0	-0.404762	42	30	35	25	0.2	-0.428571	30	30	44	43	22	22	20	30	-0.428571	-0.404762	0.2	0
2	20	2	1	1	1	15	40	178	1	35	40	-5	5	-0.125	0.125	151	2	30	30	2	0	-25	25	-0.625	0.625	-0.464286	-0.625	40	28	40	49	-0.387755	-0.125	30	30	30	30	19	19	35	30	-0.125	-0.625	-0.387755	-0.464286
2	21	2	1	1	2	21	37	177	1	30	40	-10	10	-0.25	0.25	171	2	31	31	3	5	-16	16	-0.432432	0.432432	-0.318182	-0.432432	37	22	40	35	-0.428571	-0.25	20	20	31	31	24	24	30	20	-0.25	-0.432432	-0.428571	-0.318182
2	20	2	1	1	1	10	56	132	2	20	30	-10	10	-0.333333	0.333333	177	2	42	42	15	11	-46	46	-0.821429	0.821429	0.346154	-0.821429	56	26	30	32	0.28125	-0.333333	41	41	42	42	25	25	20	41	-0.333333	-0.821429	0.28125	0.346154
2	19	2	1	1	2	40	53	152	2	45	40	5	5	0.125	0.125	146	2	39	39	20	19	-13	13	-0.245283	0.245283	0	-0.245283	53	19	40	37	-0.189189	0.125	30	30	39	39	33	33	45	30	0.125	-0.245283	-0.189189	0
2	21	2	1	1	3	10	62	158	2	50	45	5	5	0.111111	0.111111	182	2	33	33	0	0	-52	52	-0.83871	0.83871	-0.545455	-0.83871	62	33	45	30	-0.166667	0.111111	25	25	33	33	19	19	50	25	0.111111	-0.83871	-0.166667	-0.545455
1	20	2	1	1	2	40	47	147	2	45	40	5	5	0.125	0.125	175	2	38	38	5	5	-7	7	-0.148936	0.148936	-0.6	-0.148936	47	25	40	30	0	0.125	30	30	38	38	26	30	45	30	0.125	-0.148936	0	-0.6
2	26	2	1	1	2	10	27	151	3	30	24	6	6	0.25	0.25	159	2	47	42	16	10	-17	17	-0.62963	0.62963	0.25	-0.62963	27	24	24	80	-0.5	0.25	40	40	47	42	22	22	30	40	0.25	-0.62963	-0.5	0.25
2	20	2	1	1	1	45	29	169	3	40	37	3	3	0.0810811	0.0810811	125	2	34	30	16	10	16	16	0.551724	0.551724	0.0526316	0.551724	29	19	37	33	0.0606061	0.0810811	35	35	34	30	28	25	40	35	0.0810811	0.551724	0.0606061	0.0526316
1	30	2	1	1	3	45	40	147	3	30	28	2	2	0.0714286	0.0714286	180	2	41	30	3	0	5	5	0.125	0.125	1.72727	0.125	40	22	28	55	-0.545455	0.0714286	25	25	41	30	30	30	30	25	0.0714286	0.125	-0.545455	1.72727
2	18	2	1	1	1	28	45	190	1	40	30	10	10	0.333333	0.333333	180	2	60	60	22	25	-17	17	-0.377778	0.377778	0.5	-0.377778	45	28	30	30	0.666667	0.333333	50	50	60	60	32	35	40	50	0.333333	-0.377778	0.666667	0.5
2	28	2	1	1	3	50	51	180	1	42	41	1	1	0.0243902	0.0243902	171	2	42	45	25	20	-1	1	-0.0196078	0.0196078	1.06667	-0.0196078	51	15	41	46	-0.347826	0.0243902	30	30	42	45	42	45	42	30	0.0243902	-0.0196078	-0.347826	1.06667
1	30	2	1	1	1	28	45	141	3	40	35	5	5	0.142857	0.142857	188	2	48	45	9	10	-17	17	-0.377778	0.377778	-0.354839	-0.377778	45	31	35	48	-0.375	0.142857	30	30	48	45	31	30	40	30	0.142857	-0.377778	-0.375	-0.354839
1	31	2	1	1	3	22	45	166	2	35	42	-7	7	-0.166667	0.166667	184	2	40	35	8	10	-23	23	-0.511111	0.511111	0.5	-0.511111	45	32	42	40	-0.25	-0.166667	30	30	40	35	41	45	35	30	-0.166667	-0.511111	-0.25	0.5
1	27	2	1	1	2	50	55	176	2	50	52	-2	2	-0.0384615	0.0384615	144	2	44	50	5	5	-5	5	-0.0909091	0.0909091	-0.428571	-0.0909091	55	35	52	41	-0.268293	-0.0384615	30	30	44	50	48	45	50	30	-0.0384615	-0.0909091	-0.268293	-0.428571
2	28	1	2	2	3	19	48	134	3	30	54	-24	24	-0.444444	0.444444	164	4	35	35	#NULL!	#NULL!	-29	29	-0.604167	0.604167	-0.21875	-0.704545	44	32	48	41	-0.390244	0.371429	#NULL!	#NULL!	#NULL!	#NULL!	#NULL!	#NULL!	48	25	0.371429	-0.704545	-0.390244	-0.21875
2	25	1	2	2	4	7	41	181	2	45	35	10	10	0.285714	0.285714	173	4	32	32	#NULL!	#NULL!	-34	34	-0.829268	0.829268	0.1	-0.25	40	20	25	48	-0.270833	-0.285714	#NULL!	#NULL!	#NULL!	#NULL!	#NULL!	#NULL!	25	35	-0.285714	-0.25	-0.270833	0.1
1	22	1	2	2	3	15	31	146	2	35	50	-15	15	-0.3	0.3	167	4	31	31	#NULL!	#NULL!	-16	16	-0.516129	0.516129	-0.4	-0.791667	48	25	30	50	-0.2	0	#NULL!	#NULL!	#NULL!	#NULL!	#NULL!	#NULL!	30	40	0	-0.791667	-0.2	-0.4
1	21	1	2	2	4	35	42	170	2	40	22	18	18	0.818182	0.818182	164	4	15	15	#NULL!	#NULL!	-7	7	-0.166667	0.166667	0.315789	-0.857143	42	19	15	35	-0.285714	-0.571429	#NULL!	#NULL!	#NULL!	#NULL!	#NULL!	#NULL!	15	25	-0.571429	-0.857143	-0.285714	0.315789
2	22	1	2	2	4	8	32	56	2	22	45	-23	23	-0.511111	0.511111	70	4	28	28	#NULL!	#NULL!	-24	24	-0.75	0.75	-0.714286	-0.5	60	35	30	45	-0.555556	1	#NULL!	#NULL!	#NULL!	#NULL!	#NULL!	#NULL!	30	20	1	-0.5	-0.555556	-0.714286
2	18	1	2	2	3	30	30	146	2	30	25	5	5	0.2	0.2	154	4	22	22	#NULL!	#NULL!	0	0	0	0	0.458333	-0.634146	41	24	40	32	0.09375	0.333333	#NULL!	#NULL!	#NULL!	#NULL!	#NULL!	#NULL!	40	35	0.333333	-0.634146	0.09375	0.458333
2	19	1	2	2	3	15	28	179	2	30	49	-19	19	-0.387755	0.387755	176	4	19	19	#NULL!	#NULL!	-13	13	-0.464286	0.464286	-0.166667	-0.676471	34	30	30	45	-0.444444	0.2	#NULL!	#NULL!	#NULL!	#NULL!	#NULL!	#NULL!	30	25	0.2	-0.676471	-0.444444	-0.166667
2	20	1	2	2	4	15	22	174	2	20	35	-15	15	-0.428571	0.428571	160	4	24	24	#NULL!	#NULL!	-7	7	-0.318182	0.318182	-0.514286	-0.489362	47	35	40	34	-0.264706	0.333333	#NULL!	#NULL!	#NULL!	#NULL!	#NULL!	#NULL!	40	25	0.333333	-0.489362	-0.264706	-0.514286
2	22	1	2	2	3	35	26	177	2	41	32	9	9	0.28125	0.28125	179	4	25	25	#NULL!	#NULL!	9	9	0.346154	0.346154	0.333333	-0.868421	38	30	15	35	-0.285714	-0.571429	#NULL!	#NULL!	#NULL!	#NULL!	#NULL!	#NULL!	15	25	-0.571429	-0.868421	-0.285714	0.333333
2	20	1	2	2	3	19	19	182	1	30	37	-7	7	-0.189189	0.189189	170	4	33	33	#NULL!	#NULL!	0	0	0	0	0.315789	0.363636	33	19	40	20	0.25	0.142857	#NULL!	#NULL!	#NULL!	#NULL!	#NULL!	#NULL!	40	25	0.142857	0.363636	0.25	0.315789
2	27	1	2	2	3	15	33	151	1	25	30	-5	5	-0.166667	0.166667	145	4	19	19	#NULL!	#NULL!	-18	18	-0.545455	0.545455	0.190476	-0.74359	39	21	20	35	-0.142857	-0.428571	#NULL!	#NULL!	#NULL!	#NULL!	#NULL!	#NULL!	20	30	-0.428571	-0.74359	-0.142857	0.190476
1	22	1	2	2	3	10	25	148	3	30	30	0	0	0	0	176	4	26	30	#NULL!	#NULL!	-15	15	-0.6	0.6	-0.736842	0.190476	42	19	40	30	-0.166667	0.142857	#NULL!	#NULL!	#NULL!	#NULL!	#NULL!	#NULL!	40	25	0.142857	0.190476	-0.166667	-0.736842
2	19	1	2	2	2	30	24	142	3	40	80	-40	40	-0.5	0.5	181	4	22	22	#NULL!	#NULL!	6	6	0.25	0.25	0.458333	-0.0322581	31	24	50	40	0.25	0.25	#NULL!	#NULL!	#NULL!	#NULL!	#NULL!	#NULL!	50	50	0.25	-0.0322581	0.25	0.458333
2	21	1	2	2	2	20	19	129	2	35	33	2	2	0.0606061	0.0606061	165	4	28	25	#NULL!	#NULL!	1	1	0.0526316	0.0526316	0.21875	0	30	32	45	45	-0.422222	0.323529	#NULL!	#NULL!	#NULL!	#NULL!	#NULL!	#NULL!	45	26	0.323529	0	-0.422222	0.21875
2	22	1	2	2	4	60	22	180	2	25	55	-30	30	-0.545455	0.545455	177	4	30	30	#NULL!	#NULL!	38	38	1.72727	1.72727	-0.428571	-0.318182	44	35	45	35	0.142857	0.5	#NULL!	#NULL!	#NULL!	#NULL!	#NULL!	#NULL!	45	40	0.5	-0.318182	0.142857	-0.428571
2	20	1	2	2	3	42	28	180	2	50	30	20	20	0.666667	0.666667	161	4	32	35	#NULL!	#NULL!	14	14	0.5	0.5	0.0714286	1.10526	19	28	48	25	0.2	-0.0769231	#NULL!	#NULL!	#NULL!	#NULL!	#NULL!	#NULL!	48	30	-0.0769231	1.10526	0.2	0.0714286
1	36	1	2	2	3	31	15	180	3	30	46	-16	16	-0.347826	0.347826	190	4	42	45	#NULL!	#NULL!	16	16	1.06667	1.06667	0.5	-0.681159	69	30	40	20	0.5	0.25	#NULL!	#NULL!	#NULL!	#NULL!	#NULL!	#NULL!	40	30	0.25	-0.681159	0.5	0.5
1	31	1	2	2	2	20	31	161	2	30	48	-18	18	-0.375	0.375	172	4	31	30	#NULL!	#NULL!	-11	11	-0.354839	0.354839	-0.193548	-0.285714	35	31	35	45	-0.333333	-0.166667	#NULL!	#NULL!	#NULL!	#NULL!	#NULL!	#NULL!	35	30	-0.166667	-0.285714	-0.333333	-0.193548
2	21	1	2	2	3	48	32	145	3	30	40	-10	10	-0.25	0.25	161	4	41	45	#NULL!	#NULL!	16	16	0.5	0.5	-0.310345	-0.361702	47	58	40	45	-0.555556	0.0526316	#NULL!	#NULL!	#NULL!	#NULL!	#NULL!	#NULL!	40	20	0.0526316	-0.361702	-0.555556	-0.310345
2	26	1	2	2	3	20	35	188	1	30	41	-11	11	-0.268293	0.268293	192	4	48	45	#NULL!	#NULL!	-15	15	-0.428571	0.428571	-0.33871	-0.0909091	44	62	40	50	-0.2	0.0810811	#NULL!	#NULL!	#NULL!	#NULL!	#NULL!	#NULL!	40	40	0.0810811	-0.0909091	-0.2	-0.33871
2	25	2	2	3	3	25	32	#NULL!	2	25	41	-16	16	-0.390244	0.390244	145	#NULL!	#NULL!	#NULL!	#NULL!	#NULL!	-7	7	-0.21875	0.21875	#NULL!	#NULL!	#NULL!	#NULL!	#NULL!	#NULL!	#NULL!	#NULL!	#NULL!	#NULL!	#NULL!	#NULL!	#NULL!	#NULL!	#NULL!	#NULL!	#NULL!	#NULL!	#NULL!	#NULL!
2	28	2	2	3	4	22	20	#NULL!	2	35	48	-13	3	-0.270833	0.270833	182	#NULL!	#NULL!	#NULL!	#NULL!	#NULL!	2	2	0.1	0.1	#NULL!	#NULL!	#NULL!	#NULL!	#NULL!	#NULL!	#NULL!	#NULL!	#NULL!	#NULL!	#NULL!	#NULL!	#NULL!	#NULL!	#NULL!	#NULL!	#NULL!	#NULL!	#NULL!	#NULL!
2	22	2	2	3	4	15	25	#NULL!	1	40	50	-10	10	-0.2	0.2	176	#NULL!	#NULL!	#NULL!	#NULL!	#NULL!	-10	10	-0.4	0.4	#NULL!	#NULL!	#NULL!	#NULL!	#NULL!	#NULL!	#NULL!	#NULL!	#NULL!	#NULL!	#NULL!	#NULL!	#NULL!	#NULL!	#NULL!	#NULL!	#NULL!	#NULL!	#NULL!	#NULL!
1	19	2	2	3	3	25	19	#NULL!	3	25	35	-10	10	-0.285714	0.285714	130	#NULL!	#NULL!	#NULL!	#NULL!	#NULL!	6	6	0.315789	0.315789	#NULL!	#NULL!	#NULL!	#NULL!	#NULL!	#NULL!	#NULL!	#NULL!	#NULL!	#NULL!	#NULL!	#NULL!	#NULL!	#NULL!	#NULL!	#NULL!	#NULL!	#NULL!	#NULL!	#NULL!
2	19	2	2	3	4	10	35	#NULL!	2	20	45	-25	25	-0.555556	0.555556	165	#NULL!	#NULL!	#NULL!	#NULL!	#NULL!	-25	25	-0.714286	0.714286	#NULL!	#NULL!	#NULL!	#NULL!	#NULL!	#NULL!	#NULL!	#NULL!	#NULL!	#NULL!	#NULL!	#NULL!	#NULL!	#NULL!	#NULL!	#NULL!	#NULL!	#NULL!	#NULL!	#NULL!
2	18	2	2	3	3	35	24	#NULL!	3	35	32	3	3	0.09375	0.09375	148	#NULL!	#NULL!	#NULL!	#NULL!	#NULL!	11	11	0.458333	0.458333	#NULL!	#NULL!	#NULL!	#NULL!	#NULL!	#NULL!	#NULL!	#NULL!	#NULL!	#NULL!	#NULL!	#NULL!	#NULL!	#NULL!	#NULL!	#NULL!	#NULL!	#NULL!	#NULL!	#NULL!
2	26	2	2	3	4	25	30	#NULL!	2	25	45	-20	20	-0.444444	0.444444	124	#NULL!	#NULL!	#NULL!	#NULL!	#NULL!	-5	5	-0.166667	0.166667	#NULL!	#NULL!	#NULL!	#NULL!	#NULL!	#NULL!	#NULL!	#NULL!	#NULL!	#NULL!	#NULL!	#NULL!	#NULL!	#NULL!	#NULL!	#NULL!	#NULL!	#NULL!	#NULL!	#NULL!
2	20	2	2	3	3	17	35	#NULL!	3	25	34	-9	9	-0.264706	0.264706	178	#NULL!	#NULL!	#NULL!	#NULL!	#NULL!	-18	18	-0.514286	0.514286	#NULL!	#NULL!	#NULL!	#NULL!	#NULL!	#NULL!	#NULL!	#NULL!	#NULL!	#NULL!	#NULL!	#NULL!	#NULL!	#NULL!	#NULL!	#NULL!	#NULL!	#NULL!	#NULL!	#NULL!
2	20	2	2	3	3	40	30	#NULL!	2	25	35	-10	10	-0.285714	0.285714	145	#NULL!	#NULL!	#NULL!	#NULL!	#NULL!	10	10	0.333333	0.333333	#NULL!	#NULL!	#NULL!	#NULL!	#NULL!	#NULL!	#NULL!	#NULL!	#NULL!	#NULL!	#NULL!	#NULL!	#NULL!	#NULL!	#NULL!	#NULL!	#NULL!	#NULL!	#NULL!	#NULL!
2	20	2	2	3	4	25	19	#NULL!	3	25	20	5	5	0.25	0.25	171	#NULL!	#NULL!	#NULL!	#NULL!	#NULL!	6	6	0.315789	0.315789	#NULL!	#NULL!	#NULL!	#NULL!	#NULL!	#NULL!	#NULL!	#NULL!	#NULL!	#NULL!	#NULL!	#NULL!	#NULL!	#NULL!	#NULL!	#NULL!	#NULL!	#NULL!	#NULL!	#NULL!
2	35	2	2	3	3	25	21	#NULL!	2	30	35	-5	5	-0.142857	0.142857	148	#NULL!	#NULL!	#NULL!	#NULL!	#NULL!	4	4	0.190476	0.190476	#NULL!	#NULL!	#NULL!	#NULL!	#NULL!	#NULL!	#NULL!	#NULL!	#NULL!	#NULL!	#NULL!	#NULL!	#NULL!	#NULL!	#NULL!	#NULL!	#NULL!	#NULL!	#NULL!	#NULL!
2	20	2	2	3	4	5	19	#NULL!	2	25	30	-5	5	-0.166667	0.166667	170	#NULL!	#NULL!	#NULL!	#NULL!	#NULL!	-14	14	-0.736842	0.736842	#NULL!	#NULL!	#NULL!	#NULL!	#NULL!	#NULL!	#NULL!	#NULL!	#NULL!	#NULL!	#NULL!	#NULL!	#NULL!	#NULL!	#NULL!	#NULL!	#NULL!	#NULL!	#NULL!	#NULL!
2	20	2	2	3	3	35	24	#NULL!	3	50	40	10	10	0.25	0.25	195	#NULL!	#NULL!	#NULL!	#NULL!	#NULL!	11	11	0.458333	0.458333	#NULL!	#NULL!	#NULL!	#NULL!	#NULL!	#NULL!	#NULL!	#NULL!	#NULL!	#NULL!	#NULL!	#NULL!	#NULL!	#NULL!	#NULL!	#NULL!	#NULL!	#NULL!	#NULL!	#NULL!
2	24	2	2	3	4	39	32	#NULL!	2	26	45	-19	19	-0.422222	0.422222	181	#NULL!	#NULL!	#NULL!	#NULL!	#NULL!	7	7	0.21875	0.21875	#NULL!	#NULL!	#NULL!	#NULL!	#NULL!	#NULL!	#NULL!	#NULL!	#NULL!	#NULL!	#NULL!	#NULL!	#NULL!	#NULL!	#NULL!	#NULL!	#NULL!	#NULL!	#NULL!	#NULL!
1	25	2	2	3	4	20	35	#NULL!	3	40	35	5	5	0.142857	0.142857	158	#NULL!	#NULL!	#NULL!	#NULL!	#NULL!	-15	15	-0.428571	0.428571	#NULL!	#NULL!	#NULL!	#NULL!	#NULL!	#NULL!	#NULL!	#NULL!	#NULL!	#NULL!	#NULL!	#NULL!	#NULL!	#NULL!	#NULL!	#NULL!	#NULL!	#NULL!	#NULL!	#NULL!
1	22	2	2	3	4	30	28	#NULL!	2	30	25	5	5	0.2	0.2	190	#NULL!	#NULL!	#NULL!	#NULL!	#NULL!	2	2	0.0714286	0.0714286	#NULL!	#NULL!	#NULL!	#NULL!	#NULL!	#NULL!	#NULL!	#NULL!	#NULL!	#NULL!	#NULL!	#NULL!	#NULL!	#NULL!	#NULL!	#NULL!	#NULL!	#NULL!	#NULL!	#NULL!
2	28	2	2	3	4	45	30	#NULL!	3	30	20	10	10	0.5	0.5	141	#NULL!	#NULL!	#NULL!	#NULL!	#NULL!	15	15	0.5	0.5	#NULL!	#NULL!	#NULL!	#NULL!	#NULL!	#NULL!	#NULL!	#NULL!	#NULL!	#NULL!	#NULL!	#NULL!	#NULL!	#NULL!	#NULL!	#NULL!	#NULL!	#NULL!	#NULL!	#NULL!
1	21	2	2	3	3	25	31	#NULL!	2	30	45	-15	15	-0.333333	0.333333	168	#NULL!	#NULL!	#NULL!	#NULL!	#NULL!	-6	6	-0.193548	0.193548	#NULL!	#NULL!	#NULL!	#NULL!	#NULL!	#NULL!	#NULL!	#NULL!	#NULL!	#NULL!	#NULL!	#NULL!	#NULL!	#NULL!	#NULL!	#NULL!	#NULL!	#NULL!	#NULL!	#NULL!
1	22	2	2	3	4	40	58	#NULL!	1	20	45	-25	25	-0.555556	0.555556	191	#NULL!	#NULL!	#NULL!	#NULL!	#NULL!	-18	18	-0.310345	0.310345	#NULL!	#NULL!	#NULL!	#NULL!	#NULL!	#NULL!	#NULL!	#NULL!	#NULL!	#NULL!	#NULL!	#NULL!	#NULL!	#NULL!	#NULL!	#NULL!	#NULL!	#NULL!	#NULL!	#NULL!
1	31	2	2	3	4	41	62	#NULL!	3	40	50	-10	10	-0.2	0.2	171	#NULL!	#NULL!	#NULL!	#NULL!	#NULL!	-21	21	-0.33871	0.33871	#NULL!	#NULL!	#NULL!	#NULL!	#NULL!	#NULL!	#NULL!	#NULL!	#NULL!	#NULL!	#NULL!	#NULL!	#NULL!	#NULL!	#NULL!	#NULL!	#NULL!	#NULL!	#NULL!	#NULL!
2	21	1	1	4	2	13	44	#NULL!	2	48	35	13	13	0.371429	0.371429	128	#NULL!	#NULL!	#NULL!	4	13	-31	31	-0.704545	0.704545	#NULL!	#NULL!	#NULL!	#NULL!	#NULL!	#NULL!	#NULL!	#NULL!	#NULL!	#NULL!	#NULL!	#NULL!	#NULL!	#NULL!	#NULL!	#NULL!	#NULL!	#NULL!	#NULL!	#NULL!
2	20	1	1	4	3	30	40	#NULL!	2	25	35	-10	10	-0.285714	0.285714	162	#NULL!	#NULL!	#NULL!	15	7	-10	10	-0.25	0.25	#NULL!	#NULL!	#NULL!	#NULL!	#NULL!	#NULL!	#NULL!	#NULL!	#NULL!	#NULL!	#NULL!	#NULL!	#NULL!	#NULL!	#NULL!	#NULL!	#NULL!	#NULL!	#NULL!	#NULL!
2	23	1	1	4	2	10	48	#NULL!	1	30	30	0	0	0	0	156	#NULL!	#NULL!	#NULL!	18	0	-38	38	-0.791667	0.791667	#NULL!	#NULL!	#NULL!	#NULL!	#NULL!	#NULL!	#NULL!	#NULL!	#NULL!	#NULL!	#NULL!	#NULL!	#NULL!	#NULL!	#NULL!	#NULL!	#NULL!	#NULL!	#NULL!	#NULL!
2	22	1	1	4	1	6	42	#NULL!	3	15	35	-20	20	-0.571429	0.571429	191	#NULL!	#NULL!	#NULL!	27	15	-36	36	-0.857143	0.857143	#NULL!	#NULL!	#NULL!	#NULL!	#NULL!	#NULL!	#NULL!	#NULL!	#NULL!	#NULL!	#NULL!	#NULL!	#NULL!	#NULL!	#NULL!	#NULL!	#NULL!	#NULL!	#NULL!	#NULL!
2	21	1	1	4	2	30	60	#NULL!	3	30	15	15	15	1	1	175	#NULL!	#NULL!	#NULL!	10	10	-30	30	-0.5	0.5	#NULL!	#NULL!	#NULL!	#NULL!	#NULL!	#NULL!	#NULL!	#NULL!	#NULL!	#NULL!	#NULL!	#NULL!	#NULL!	#NULL!	#NULL!	#NULL!	#NULL!	#NULL!	#NULL!	#NULL!
2	20	1	1	4	3	15	41	#NULL!	4	40	30	10	10	0.333333	0.333333	177	#NULL!	#NULL!	#NULL!	11	0	-26	26	-0.634146	0.634146	#NULL!	#NULL!	#NULL!	#NULL!	#NULL!	#NULL!	#NULL!	#NULL!	#NULL!	#NULL!	#NULL!	#NULL!	#NULL!	#NULL!	#NULL!	#NULL!	#NULL!	#NULL!	#NULL!	#NULL!
1	19	1	1	4	2	11	34	#NULL!	2	30	25	5	5	0.2	0.2	165	#NULL!	#NULL!	#NULL!	4	0	-23	23	-0.676471	0.676471	#NULL!	#NULL!	#NULL!	#NULL!	#NULL!	#NULL!	#NULL!	#NULL!	#NULL!	#NULL!	#NULL!	#NULL!	#NULL!	#NULL!	#NULL!	#NULL!	#NULL!	#NULL!	#NULL!	#NULL!
2	22	1	1	4	2	24	47	#NULL!	2	40	30	10	10	0.333333	0.333333	181	#NULL!	#NULL!	#NULL!	14	12	-23	23	-0.489362	0.489362	#NULL!	#NULL!	#NULL!	#NULL!	#NULL!	#NULL!	#NULL!	#NULL!	#NULL!	#NULL!	#NULL!	#NULL!	#NULL!	#NULL!	#NULL!	#NULL!	#NULL!	#NULL!	#NULL!	#NULL!
2	19	1	1	4	3	5	38	#NULL!	3	15	35	-20	20	-0.571429	0.571429	148	#NULL!	#NULL!	#NULL!	23	10	-33	33	-0.868421	0.868421	#NULL!	#NULL!	#NULL!	#NULL!	#NULL!	#NULL!	#NULL!	#NULL!	#NULL!	#NULL!	#NULL!	#NULL!	#NULL!	#NULL!	#NULL!	#NULL!	#NULL!	#NULL!	#NULL!	#NULL!
2	23	1	1	4	2	45	33	#NULL!	1	40	35	5	5	0.142857	0.142857	159	#NULL!	#NULL!	#NULL!	7	5	12	12	0.363636	0.363636	#NULL!	#NULL!	#NULL!	#NULL!	#NULL!	#NULL!	#NULL!	#NULL!	#NULL!	#NULL!	#NULL!	#NULL!	#NULL!	#NULL!	#NULL!	#NULL!	#NULL!	#NULL!	#NULL!	#NULL!
2	19	1	1	4	3	10	39	#NULL!	2	20	35	-15	15	-0.428571	0.428571	177	#NULL!	#NULL!	#NULL!	19	0	-29	29	-0.74359	0.74359	#NULL!	#NULL!	#NULL!	#NULL!	#NULL!	#NULL!	#NULL!	#NULL!	#NULL!	#NULL!	#NULL!	#NULL!	#NULL!	#NULL!	#NULL!	#NULL!	#NULL!	#NULL!	#NULL!	#NULL!
2	28	1	1	4	2	50	42	#NULL!	1	40	35	5	5	0.142857	0.142857	165	#NULL!	#NULL!	#NULL!	2	5	8	8	0.190476	0.190476	#NULL!	#NULL!	#NULL!	#NULL!	#NULL!	#NULL!	#NULL!	#NULL!	#NULL!	#NULL!	#NULL!	#NULL!	#NULL!	#NULL!	#NULL!	#NULL!	#NULL!	#NULL!	#NULL!	#NULL!
1	22	1	1	4	1	30	31	#NULL!	2	50	40	10	10	0.25	0.25	158	#NULL!	#NULL!	#NULL!	29	25	-1	1	-0.0322581	0.0322581	#NULL!	#NULL!	#NULL!	#NULL!	#NULL!	#NULL!	#NULL!	#NULL!	#NULL!	#NULL!	#NULL!	#NULL!	#NULL!	#NULL!	#NULL!	#NULL!	#NULL!	#NULL!	#NULL!	#NULL!
2	27	1	1	4	2	30	30	#NULL!	2	45	34	11	11	0.323529	0.323529	178	#NULL!	#NULL!	#NULL!	15	15	0	0	0	0	#NULL!	#NULL!	#NULL!	#NULL!	#NULL!	#NULL!	#NULL!	#NULL!	#NULL!	#NULL!	#NULL!	#NULL!	#NULL!	#NULL!	#NULL!	#NULL!	#NULL!	#NULL!	#NULL!	#NULL!
2	31	1	1	4	2	30	44	#NULL!	3	45	30	15	15	0.5	0.5	166	#NULL!	#NULL!	#NULL!	1	5	-14	14	-0.318182	0.318182	#NULL!	#NULL!	#NULL!	#NULL!	#NULL!	#NULL!	#NULL!	#NULL!	#NULL!	#NULL!	#NULL!	#NULL!	#NULL!	#NULL!	#NULL!	#NULL!	#NULL!	#NULL!	#NULL!	#NULL!
1	22	1	1	4	3	40	19	#NULL!	3	48	52	-4	4	-0.0769231	0.0769231	152	#NULL!	#NULL!	#NULL!	29	23	21	21	1.10526	1.10526	#NULL!	#NULL!	#NULL!	#NULL!	#NULL!	#NULL!	#NULL!	#NULL!	#NULL!	#NULL!	#NULL!	#NULL!	#NULL!	#NULL!	#NULL!	#NULL!	#NULL!	#NULL!	#NULL!	#NULL!
1	36	1	1	4	2	22	69	#NULL!	3	40	32	8	8	0.25	0.25	181	#NULL!	#NULL!	#NULL!	29	20	-47	47	-0.681159	0.681159	#NULL!	#NULL!	#NULL!	#NULL!	#NULL!	#NULL!	#NULL!	#NULL!	#NULL!	#NULL!	#NULL!	#NULL!	#NULL!	#NULL!	#NULL!	#NULL!	#NULL!	#NULL!	#NULL!	#NULL!
2	21	1	1	4	3	25	35	#NULL!	2	35	42	-7	7	-0.166667	0.166667	160	#NULL!	#NULL!	#NULL!	0	0	-10	10	-0.285714	0.285714	#NULL!	#NULL!	#NULL!	#NULL!	#NULL!	#NULL!	#NULL!	#NULL!	#NULL!	#NULL!	#NULL!	#NULL!	#NULL!	#NULL!	#NULL!	#NULL!	#NULL!	#NULL!	#NULL!	#NULL!
1	28	1	1	4	2	30	47	#NULL!	3	40	38	2	2	0.0526316	0.0526316	161	#NULL!	#NULL!	#NULL!	7	0	-17	17	-0.361702	0.361702	#NULL!	#NULL!	#NULL!	#NULL!	#NULL!	#NULL!	#NULL!	#NULL!	#NULL!	#NULL!	#NULL!	#NULL!	#NULL!	#NULL!	#NULL!	#NULL!	#NULL!	#NULL!	#NULL!	#NULL!
2	30	1	1	4	3	40	44	#NULL!	2	40	37	3	3	0.0810811	0.0810811	160	#NULL!	#NULL!	#NULL!	4	5	-4	4	-0.0909091	0.0909091	#NULL!	#NULL!	#NULL!	#NULL!	#NULL!	#NULL!	#NULL!	#NULL!	#NULL!	#NULL!	#NULL!	#NULL!	#NULL!	#NULL!	#NULL!	#NULL!	#NULL!	#NULL!	#NULL!	#NULL!
#NULL!	#NULL!	#NULL!	#NULL!	#NULL!	#NULL!	#NULL!	#NULL!	#NULL!	#NULL!	#NULL!	#NULL!	#NULL!	#NULL!	#NULL!	#NULL!	#NULL!	#NULL!	#NULL!	#NULL!	#NULL!	#NULL!	#NULL!	#NULL!	#NULL!	#NULL!	#NULL!	#NULL!	#NULL!	#NULL!	#NULL!	#NULL!	#NULL!	#NULL!	#NULL!	#NULL!	#NULL!	#NULL!	#NULL!	#NULL!	#NULL!	#NULL!	#NULL!	#NULL!	#NULL!	#NULL!
#NULL!	#NULL!	#NULL!	#NULL!	#NULL!	#NULL!	#NULL!	#NULL!	#NULL!	#NULL!	#NULL!	#NULL!	#NULL!	#NULL!	#NULL!	#NULL!	#NULL!	#NULL!	#NULL!	#NULL!	#NULL!	#NULL!	#NULL!	#NULL!	#NULL!	#NULL!	#NULL!	#NULL!	#NULL!	#NULL!	#NULL!	#NULL!	#NULL!	#NULL!	#NULL!	#NULL!	#NULL!	#NULL!	#NULL!	#NULL!	#NULL!	#NULL!	#NULL!	#NULL!	#NULL!	#NULL!
#NULL!	#NULL!	#NULL!	#NULL!	#NULL!	#NULL!	#NULL!	#NULL!	#NULL!	#NULL!	#NULL!	#NULL!	#NULL!	#NULL!	#NULL!	#NULL!	#NULL!	#NULL!	#NULL!	#NULL!	#NULL!	#NULL!	#NULL!	#NULL!	#NULL!	#NULL!	#NULL!	#NULL!	#NULL!	#NULL!	#NULL!	#NULL!	#NULL!	#NULL!	#NULL!	#NULL!	#NULL!	#NULL!	#NULL!	#NULL!	#NULL!	#NULL!	#NULL!	#NULL!	#NULL!	#NULL!
#NULL!	#NULL!	#NULL!	#NULL!	#NULL!	#NULL!	#NULL!	#NULL!	#NULL!	#NULL!	#NULL!	#NULL!	#NULL!	#NULL!	#NULL!	#NULL!	#NULL!	#NULL!	#NULL!	#NULL!	#NULL!	#NULL!	#NULL!	#NULL!	#NULL!	#NULL!	#NULL!	#NULL!	#NULL!	#NULL!	#NULL!	#NULL!	#NULL!	#NULL!	#NULL!	#NULL!	#NULL!	#NULL!	#NULL!	#NULL!	#NULL!	#NULL!	#NULL!	#NULL!	#NULL!	#NULL!
#NULL!	#NULL!	#NULL!	#NULL!	#NULL!	#NULL!	#NULL!	#NULL!	#NULL!	#NULL!	#NULL!	#NULL!	#NULL!	#NULL!	#NULL!	#NULL!	#NULL!	#NULL!	#NULL!	#NULL!	#NULL!	#NULL!	#NULL!	#NULL!	#NULL!	#NULL!	#NULL!	#NULL!	#NULL!	#NULL!	#NULL!	#NULL!	#NULL!	#NULL!	#NULL!	#NULL!	#NULL!	#NULL!	#NULL!	#NULL!	#NULL!	#NULL!	#NULL!	#NULL!	#NULL!	#NULL!
#NULL!	#NULL!	#NULL!	#NULL!	#NULL!	#NULL!	#NULL!	#NULL!	#NULL!	#NULL!	#NULL!	#NULL!	#NULL!	#NULL!	#NULL!	#NULL!	#NULL!	#NULL!	#NULL!	#NULL!	#NULL!	#NULL!	#NULL!	#NULL!	#NULL!	#NULL!	#NULL!	#NULL!	#NULL!	#NULL!	#NULL!	#NULL!	#NULL!	#NULL!	#NULL!	#NULL!	#NULL!	#NULL!	#NULL!	#NULL!	#NULL!	#NULL!	#NULL!	#NULL!	#NULL!	#NULL!
#NULL!	#NULL!	#NULL!	#NULL!	#NULL!	#NULL!	#NULL!	#NULL!	#NULL!	#NULL!	#NULL!	#NULL!	#NULL!	#NULL!	#NULL!	#NULL!	#NULL!	#NULL!	#NULL!	#NULL!	#NULL!	#NULL!	#NULL!	#NULL!	#NULL!	#NULL!	#NULL!	#NULL!	#NULL!	#NULL!	#NULL!	#NULL!	#NULL!	#NULL!	#NULL!	#NULL!	#NULL!	#NULL!	#NULL!	#NULL!	#NULL!	#NULL!	#NULL!	#NULL!	#NULL!	#NULL!
#NULL!	#NULL!	#NULL!	#NULL!	#NULL!	#NULL!	#NULL!	#NULL!	#NULL!	#NULL!	#NULL!	#NULL!	#NULL!	#NULL!	#NULL!	#NULL!	#NULL!	#NULL!	#NULL!	#NULL!	#NULL!	#NULL!	#NULL!	#NULL!	#NULL!	#NULL!	#NULL!	#NULL!	#NULL!	#NULL!	#NULL!	#NULL!	#NULL!	#NULL!	#NULL!	#NULL!	#NULL!	#NULL!	#NULL!	#NULL!	#NULL!	#NULL!	#NULL!	#NULL!	#NULL!	#NULL!
#NULL!	#NULL!	#NULL!	#NULL!	#NULL!	#NULL!	#NULL!	#NULL!	#NULL!	#NULL!	#NULL!	#NULL!	#NULL!	#NULL!	#NULL!	#NULL!	#NULL!	#NULL!	#NULL!	#NULL!	#NULL!	#NULL!	#NULL!	#NULL!	#NULL!	#NULL!	#NULL!	#NULL!	#NULL!	#NULL!	#NULL!	#NULL!	#NULL!	#NULL!	#NULL!	#NULL!	#NULL!	#NULL!	#NULL!	#NULL!	#NULL!	#NULL!	#NULL!	#NULL!	#NULL!	#NULL!
#NULL!	#NULL!	#NULL!	#NULL!	#NULL!	#NULL!	#NULL!	#NULL!	#NULL!	#NULL!	#NULL!	#NULL!	#NULL!	#NULL!	#NULL!	#NULL!	#NULL!	#NULL!	#NULL!	#NULL!	#NULL!	#NULL!	#NULL!	#NULL!	#NULL!	#NULL!	#NULL!	#NULL!	#NULL!	#NULL!	#NULL!	#NULL!	#NULL!	#NULL!	#NULL!	#NULL!	#NULL!	#NULL!	#NULL!	#NULL!	#NULL!	#NULL!	#NULL!	#NULL!	#NULL!	#NULL!
#NULL!	#NULL!	#NULL!	#NULL!	#NULL!	#NULL!	#NULL!	#NULL!	#NULL!	#NULL!	#NULL!	#NULL!	#NULL!	#NULL!	#NULL!	#NULL!	#NULL!	#NULL!	#NULL!	#NULL!	#NULL!	#NULL!	#NULL!	#NULL!	#NULL!	#NULL!	#NULL!	#NULL!	#NULL!	#NULL!	#NULL!	#NULL!	#NULL!	#NULL!	#NULL!	#NULL!	#NULL!	#NULL!	#NULL!	#NULL!	#NULL!	#NULL!	#NULL!	#NULL!	#NULL!	#NULL!
#NULL!	#NULL!	#NULL!	#NULL!	#NULL!	#NULL!	#NULL!	#NULL!	#NULL!	#NULL!	#NULL!	#NULL!	#NULL!	#NULL!	#NULL!	#NULL!	#NULL!	#NULL!	#NULL!	#NULL!	#NULL!	#NULL!	#NULL!	#NULL!	#NULL!	#NULL!	#NULL!	#NULL!	#NULL!	#NULL!	#NULL!	#NULL!	#NULL!	#NULL!	#NULL!	#NULL!	#NULL!	#NULL!	#NULL!	#NULL!	#NULL!	#NULL!	#NULL!	#NULL!	#NULL!	#NULL!
#NULL!	#NULL!	#NULL!	#NULL!	#NULL!	#NULL!	#NULL!	#NULL!	#NULL!	#NULL!	#NULL!	#NULL!	#NULL!	#NULL!	#NULL!	#NULL!	#NULL!	#NULL!	#NULL!	#NULL!	#NULL!	#NULL!	#NULL!	#NULL!	#NULL!	#NULL!	#NULL!	#NULL!	#NULL!	#NULL!	#NULL!	#NULL!	#NULL!	#NULL!	#NULL!	#NULL!	#NULL!	#NULL!	#NULL!	#NULL!	#NULL!	#NULL!	#NULL!	#NULL!	#NULL!	#NULL!
#NULL!	#NULL!	#NULL!	#NULL!	#NULL!	#NULL!	#NULL!	#NULL!	#NULL!	#NULL!	#NULL!	#NULL!	#NULL!	#NULL!	#NULL!	#NULL!	#NULL!	#NULL!	#NULL!	#NULL!	#NULL!	#NULL!	#NULL!	#NULL!	#NULL!	#NULL!	#NULL!	#NULL!	#NULL!	#NULL!	#NULL!	#NULL!	#NULL!	#NULL!	#NULL!	#NULL!	#NULL!	#NULL!	#NULL!	#NULL!	#NULL!	#NULL!	#NULL!	#NULL!	#NULL!	#NULL!
#NULL!	#NULL!	#NULL!	#NULL!	#NULL!	#NULL!	#NULL!	#NULL!	#NULL!	#NULL!	#NULL!	#NULL!	#NULL!	#NULL!	#NULL!	#NULL!	#NULL!	#NULL!	#NULL!	#NULL!	#NULL!	#NULL!	#NULL!	#NULL!	#NULL!	#NULL!	#NULL!	#NULL!	#NULL!	#NULL!	#NULL!	#NULL!	#NULL!	#NULL!	#NULL!	#NULL!	#NULL!	#NULL!	#NULL!	#NULL!	#NULL!	#NULL!	#NULL!	#NULL!	#NULL!	#NULL!
#NULL!	#NULL!	#NULL!	#NULL!	#NULL!	#NULL!	#NULL!	#NULL!	#NULL!	#NULL!	#NULL!	#NULL!	#NULL!	#NULL!	#NULL!	#NULL!	#NULL!	#NULL!	#NULL!	#NULL!	#NULL!	#NULL!	#NULL!	#NULL!	#NULL!	#NULL!	#NULL!	#NULL!	#NULL!	#NULL!	#NULL!	#NULL!	#NULL!	#NULL!	#NULL!	#NULL!	#NULL!	#NULL!	#NULL!	#NULL!	#NULL!	#NULL!	#NULL!	#NULL!	#NULL!	#NULL!
#NULL!	#NULL!	#NULL!	#NULL!	#NULL!	#NULL!	#NULL!	#NULL!	#NULL!	#NULL!	#NULL!	#NULL!	#NULL!	#NULL!	#NULL!	#NULL!	#NULL!	#NULL!	#NULL!	#NULL!	#NULL!	#NULL!	#NULL!	#NULL!	#NULL!	#NULL!	#NULL!	#NULL!	#NULL!	#NULL!	#NULL!	#NULL!	#NULL!	#NULL!	#NULL!	#NULL!	#NULL!	#NULL!	#NULL!	#NULL!	#NULL!	#NULL!	#NULL!	#NULL!	#NULL!	#NULL!
#NULL!	#NULL!	#NULL!	#NULL!	#NULL!	#NULL!	#NULL!	#NULL!	#NULL!	#NULL!	#NULL!	#NULL!	#NULL!	#NULL!	#NULL!	#NULL!	#NULL!	#NULL!	#NULL!	#NULL!	#NULL!	#NULL!	#NULL!	#NULL!	#NULL!	#NULL!	#NULL!	#NULL!	#NULL!	#NULL!	#NULL!	#NULL!	#NULL!	#NULL!	#NULL!	#NULL!	#NULL!	#NULL!	#NULL!	#NULL!	#NULL!	#NULL!	#NULL!	#NULL!	#NULL!	#NULL!
#NULL!	#NULL!	#NULL!	#NULL!	#NULL!	#NULL!	#NULL!	#NULL!	#NULL!	#NULL!	#NULL!	#NULL!	#NULL!	#NULL!	#NULL!	#NULL!	#NULL!	#NULL!	#NULL!	#NULL!	#NULL!	#NULL!	#NULL!	#NULL!	#NULL!	#NULL!	#NULL!	#NULL!	#NULL!	#NULL!	#NULL!	#NULL!	#NULL!	#NULL!	#NULL!	#NULL!	#NULL!	#NULL!	#NULL!	#NULL!	#NULL!	#NULL!	#NULL!	#NULL!	#NULL!	#NULL!
#NULL!	#NULL!	#NULL!	#NULL!	#NULL!	#NULL!	#NULL!	#NULL!	#NULL!	#NULL!	#NULL!	#NULL!	#NULL!	#NULL!	#NULL!	#NULL!	#NULL!	#NULL!	#NULL!	#NULL!	#NULL!	#NULL!	#NULL!	#NULL!	#NULL!	#NULL!	#NULL!	#NULL!	#NULL!	#NULL!	#NULL!	#NULL!	#NULL!	#NULL!	#NULL!	#NULL!	#NULL!	#NULL!	#NULL!	#NULL!	#NULL!	#NULL!	#NULL!	#NULL!	#NULL!	#NULL!
#NULL!	#NULL!	#NULL!	#NULL!	#NULL!	#NULL!	#NULL!	#NULL!	#NULL!	#NULL!	#NULL!	#NULL!	#NULL!	#NULL!	#NULL!	#NULL!	#NULL!	#NULL!	#NULL!	#NULL!	#NULL!	#NULL!	#NULL!	#NULL!	#NULL!	#NULL!	#NULL!	#NULL!	#NULL!	#NULL!	#NULL!	#NULL!	#NULL!	#NULL!	#NULL!	#NULL!	#NULL!	#NULL!	#NULL!	#NULL!	#NULL!	#NULL!	#NULL!	#NULL!	#NULL!	#NULL!
#NULL!	#NULL!	#NULL!	#NULL!	#NULL!	#NULL!	#NULL!	#NULL!	#NULL!	#NULL!	#NULL!	#NULL!	#NULL!	#NULL!	#NULL!	#NULL!	#NULL!	#NULL!	#NULL!	#NULL!	#NULL!	#NULL!	#NULL!	#NULL!	#NULL!	#NULL!	#NULL!	#NULL!	#NULL!	#NULL!	#NULL!	#NULL!	#NULL!	#NULL!	#NULL!	#NULL!	#NULL!	#NULL!	#NULL!	#NULL!	#NULL!	#NULL!	#NULL!	#NULL!	#NULL!	#NULL!
#NULL!	#NULL!	#NULL!	#NULL!	#NULL!	#NULL!	#NULL!	#NULL!	#NULL!	#NULL!	#NULL!	#NULL!	#NULL!	#NULL!	#NULL!	#NULL!	#NULL!	#NULL!	#NULL!	#NULL!	#NULL!	#NULL!	#NULL!	#NULL!	#NULL!	#NULL!	#NULL!	#NULL!	#NULL!	#NULL!	#NULL!	#NULL!	#NULL!	#NULL!	#NULL!	#NULL!	#NULL!	#NULL!	#NULL!	#NULL!	#NULL!	#NULL!	#NULL!	#NULL!	#NULL!	#NULL!
#NULL!	#NULL!	#NULL!	#NULL!	#NULL!	#NULL!	#NULL!	#NULL!	#NULL!	#NULL!	#NULL!	#NULL!	#NULL!	#NULL!	#NULL!	#NULL!	#NULL!	#NULL!	#NULL!	#NULL!	#NULL!	#NULL!	#NULL!	#NULL!	#NULL!	#NULL!	#NULL!	#NULL!	#NULL!	#NULL!	#NULL!	#NULL!	#NULL!	#NULL!	#NULL!	#NULL!	#NULL!	#NULL!	#NULL!	#NULL!	#NULL!	#NULL!	#NULL!	#NULL!	#NULL!	#NULL!
#NULL!	#NULL!	#NULL!	#NULL!	#NULL!	#NULL!	#NULL!	#NULL!	#NULL!	#NULL!	#NULL!	#NULL!	#NULL!	#NULL!	#NULL!	#NULL!	#NULL!	#NULL!	#NULL!	#NULL!	#NULL!	#NULL!	#NULL!	#NULL!	#NULL!	#NULL!	#NULL!	#NULL!	#NULL!	#NULL!	#NULL!	#NULL!	#NULL!	#NULL!	#NULL!	#NULL!	#NULL!	#NULL!	#NULL!	#NULL!	#NULL!	#NULL!	#NULL!	#NULL!	#NULL!	#NULL!
#NULL!	#NULL!	#NULL!	#NULL!	#NULL!	#NULL!	#NULL!	#NULL!	#NULL!	#NULL!	#NULL!	#NULL!	#NULL!	#NULL!	#NULL!	#NULL!	#NULL!	#NULL!	#NULL!	#NULL!	#NULL!	#NULL!	#NULL!	#NULL!	#NULL!	#NULL!	#NULL!	#NULL!	#NULL!	#NULL!	#NULL!	#NULL!	#NULL!	#NULL!	#NULL!	#NULL!	#NULL!	#NULL!	#NULL!	#NULL!	#NULL!	#NULL!	#NULL!	#NULL!	#NULL!	#NULL!
#NULL!	#NULL!	#NULL!	#NULL!	#NULL!	#NULL!	#NULL!	#NULL!	#NULL!	#NULL!	#NULL!	#NULL!	#NULL!	#NULL!	#NULL!	#NULL!	#NULL!	#NULL!	#NULL!	#NULL!	#NULL!	#NULL!	#NULL!	#NULL!	#NULL!	#NULL!	#NULL!	#NULL!	#NULL!	#NULL!	#NULL!	#NULL!	#NULL!	#NULL!	#NULL!	#NULL!	#NULL!	#NULL!	#NULL!	#NULL!	#NULL!	#NULL!	#NULL!	#NULL!	#NULL!	#NULL!
#NULL!	#NULL!	#NULL!	#NULL!	#NULL!	#NULL!	#NULL!	#NULL!	#NULL!	#NULL!	#NULL!	#NULL!	#NULL!	#NULL!	#NULL!	#NULL!	#NULL!	#NULL!	#NULL!	#NULL!	#NULL!	#NULL!	#NULL!	#NULL!	#NULL!	#NULL!	#NULL!	#NULL!	#NULL!	#NULL!	#NULL!	#NULL!	#NULL!	#NULL!	#NULL!	#NULL!	#NULL!	#NULL!	#NULL!	#NULL!	#NULL!	#NULL!	#NULL!	#NULL!	#NULL!	#NULL!
#NULL!	#NULL!	#NULL!	#NULL!	#NULL!	#NULL!	#NULL!	#NULL!	#NULL!	#NULL!	#NULL!	#NULL!	#NULL!	#NULL!	#NULL!	#NULL!	#NULL!	#NULL!	#NULL!	#NULL!	#NULL!	#NULL!	#NULL!	#NULL!	#NULL!	#NULL!	#NULL!	#NULL!	#NULL!	#NULL!	#NULL!	#NULL!	#NULL!	#NULL!	#NULL!	#NULL!	#NULL!	#NULL!	#NULL!	#NULL!	#NULL!	#NULL!	#NULL!	#NULL!	#NULL!	#NULL!
#NULL!	#NULL!	#NULL!	#NULL!	#NULL!	#NULL!	#NULL!	#NULL!	#NULL!	#NULL!	#NULL!	#NULL!	#NULL!	#NULL!	#NULL!	#NULL!	#NULL!	#NULL!	#NULL!	#NULL!	#NULL!	#NULL!	#NULL!	#NULL!	#NULL!	#NULL!	#NULL!	#NULL!	#NULL!	#NULL!	#NULL!	#NULL!	#NULL!	#NULL!	#NULL!	#NULL!	#NULL!	#NULL!	#NULL!	#NULL!	#NULL!	#NULL!	#NULL!	#NULL!	#NULL!	#NULL!
#NULL!	#NULL!	#NULL!	#NULL!	#NULL!	#NULL!	#NULL!	#NULL!	#NULL!	#NULL!	#NULL!	#NULL!	#NULL!	#NULL!	#NULL!	#NULL!	#NULL!	#NULL!	#NULL!	#NULL!	#NULL!	#NULL!	#NULL!	#NULL!	#NULL!	#NULL!	#NULL!	#NULL!	#NULL!	#NULL!	#NULL!	#NULL!	#NULL!	#NULL!	#NULL!	#NULL!	#NULL!	#NULL!	#NULL!	#NULL!	#NULL!	#NULL!	#NULL!	#NULL!	#NULL!	#NULL!
#NULL!	#NULL!	#NULL!	#NULL!	#NULL!	#NULL!	#NULL!	#NULL!	#NULL!	#NULL!	#NULL!	#NULL!	#NULL!	#NULL!	#NULL!	#NULL!	#NULL!	#NULL!	#NULL!	#NULL!	#NULL!	#NULL!	#NULL!	#NULL!	#NULL!	#NULL!	#NULL!	#NULL!	#NULL!	#NULL!	#NULL!	#NULL!	#NULL!	#NULL!	#NULL!	#NULL!	#NULL!	#NULL!	#NULL!	#NULL!	#NULL!	#NULL!	#NULL!	#NULL!	#NULL!	#NULL!
#NULL!	#NULL!	#NULL!	#NULL!	#NULL!	#NULL!	#NULL!	#NULL!	#NULL!	#NULL!	#NULL!	#NULL!	#NULL!	#NULL!	#NULL!	#NULL!	#NULL!	#NULL!	#NULL!	#NULL!	#NULL!	#NULL!	#NULL!	#NULL!	#NULL!	#NULL!	#NULL!	#NULL!	#NULL!	#NULL!	#NULL!	#NULL!	#NULL!	#NULL!	#NULL!	#NULL!	#NULL!	#NULL!	#NULL!	#NULL!	#NULL!	#NULL!	#NULL!	#NULL!	#NULL!	#NULL!
#NULL!	#NULL!	#NULL!	#NULL!	#NULL!	#NULL!	#NULL!	#NULL!	#NULL!	#NULL!	#NULL!	#NULL!	#NULL!	#NULL!	#NULL!	#NULL!	#NULL!	#NULL!	#NULL!	#NULL!	#NULL!	#NULL!	#NULL!	#NULL!	#NULL!	#NULL!	#NULL!	#NULL!	#NULL!	#NULL!	#NULL!	#NULL!	#NULL!	#NULL!	#NULL!	#NULL!	#NULL!	#NULL!	#NULL!	#NULL!	#NULL!	#NULL!	#NULL!	#NULL!	#NULL!	#NULL!
#NULL!	#NULL!	#NULL!	#NULL!	#NULL!	#NULL!	#NULL!	#NULL!	#NULL!	#NULL!	#NULL!	#NULL!	#NULL!	#NULL!	#NULL!	#NULL!	#NULL!	#NULL!	#NULL!	#NULL!	#NULL!	#NULL!	#NULL!	#NULL!	#NULL!	#NULL!	#NULL!	#NULL!	#NULL!	#NULL!	#NULL!	#NULL!	#NULL!	#NULL!	#NULL!	#NULL!	#NULL!	#NULL!	#NULL!	#NULL!	#NULL!	#NULL!	#NULL!	#NULL!	#NULL!	#NULL!
#NULL!	#NULL!	#NULL!	#NULL!	#NULL!	#NULL!	#NULL!	#NULL!	#NULL!	#NULL!	#NULL!	#NULL!	#NULL!	#NULL!	#NULL!	#NULL!	#NULL!	#NULL!	#NULL!	#NULL!	#NULL!	#NULL!	#NULL!	#NULL!	#NULL!	#NULL!	#NULL!	#NULL!	#NULL!	#NULL!	#NULL!	#NULL!	#NULL!	#NULL!	#NULL!	#NULL!	#NULL!	#NULL!	#NULL!	#NULL!	#NULL!	#NULL!	#NULL!	#NULL!	#NULL!	#NULL!
#NULL!	#NULL!	#NULL!	#NULL!	#NULL!	#NULL!	#NULL!	#NULL!	#NULL!	#NULL!	#NULL!	#NULL!	#NULL!	#NULL!	#NULL!	#NULL!	#NULL!	#NULL!	#NULL!	#NULL!	#NULL!	#NULL!	#NULL!	#NULL!	#NULL!	#NULL!	#NULL!	#NULL!	#NULL!	#NULL!	#NULL!	#NULL!	#NULL!	#NULL!	#NULL!	#NULL!	#NULL!	#NULL!	#NULL!	#NULL!	#NULL!	#NULL!	#NULL!	#NULL!	#NULL!	#NULL!
#NULL!	#NULL!	#NULL!	#NULL!	#NULL!	#NULL!	#NULL!	#NULL!	#NULL!	#NULL!	#NULL!	#NULL!	#NULL!	#NULL!	#NULL!	#NULL!	#NULL!	#NULL!	#NULL!	#NULL!	#NULL!	#NULL!	#NULL!	#NULL!	#NULL!	#NULL!	#NULL!	#NULL!	#NULL!	#NULL!	#NULL!	#NULL!	#NULL!	#NULL!	#NULL!	#NULL!	#NULL!	#NULL!	#NULL!	#NULL!	#NULL!	#NULL!	#NULL!	#NULL!	#NULL!	#NULL!
#NULL!	#NULL!	#NULL!	#NULL!	#NULL!	#NULL!	#NULL!	#NULL!	#NULL!	#NULL!	#NULL!	#NULL!	#NULL!	#NULL!	#NULL!	#NULL!	#NULL!	#NULL!	#NULL!	#NULL!	#NULL!	#NULL!	#NULL!	#NULL!	#NULL!	#NULL!	#NULL!	#NULL!	#NULL!	#NULL!	#NULL!	#NULL!	#NULL!	#NULL!	#NULL!	#NULL!	#NULL!	#NULL!	#NULL!	#NULL!	#NULL!	#NULL!	#NULL!	#NULL!	#NULL!	#NULL!
#NULL!	#NULL!	#NULL!	#NULL!	#NULL!	#NULL!	#NULL!	#NULL!	#NULL!	#NULL!	#NULL!	#NULL!	#NULL!	#NULL!	#NULL!	#NULL!	#NULL!	#NULL!	#NULL!	#NULL!	#NULL!	#NULL!	#NULL!	#NULL!	#NULL!	#NULL!	#NULL!	#NULL!	#NULL!	#NULL!	#NULL!	#NULL!	#NULL!	#NULL!	#NULL!	#NULL!	#NULL!	#NULL!	#NULL!	#NULL!	#NULL!	#NULL!	#NULL!	#NULL!	#NULL!	#NULL!
